# Supplementary material for: GmBZL3 acts as a major BR signaling regulator through crosstalk with multiple pathways in Glycine max
Source: BMC Plant Biol. 2019 Feb 22;19:86. doi: 10.1186/s12870-019-1677-2 (PMC6387493; doi:10.1186/s12870-019-1677-2)
Supplement: Supplementary file 4 — ChIP data reveal genes potentially regulated by the GmBZL3 transcription factor in soybean. (XLSX 38 kb) [file 12870_2019_1677_MOESM4_ESM.xlsx]

## Sheet: Additional file 4
Additional file 4. ChIP data reveals genes high potentially regulated by GmBZR1-1 transcription factor in Soybean.
Gene_ID	New Gene_ID	Description
Glyma19g09320	Glyma.19G057500	12-oxophytodienoate reductase 2
Glyma05g17140	Glyma.05G083500	26S proteasome regulatory subunit S2 1A
Glyma06g27880	Glyma.06G219200	26S proteasome regulatory subunit, putative
Glyma02g37350	Glyma.02G210800	2-oxoglutarate (2OG) and Fe(II)-dependent oxygenase superfamily protein
Glyma07g25390	Glyma.07G168500	2-oxoglutarate (2OG) and Fe(II)-dependent oxygenase superfamily protein
Glyma09g26780	Glyma.09G144900	2-oxoglutarate (2OG) and Fe(II)-dependent oxygenase superfamily protein
Glyma13g09370	Glyma.13G036200	2-oxoglutarate (2OG) and Fe(II)-dependent oxygenase superfamily protein
Glyma18g35220	Glyma.18G164100	2-oxoglutarate (2OG) and Fe(II)-dependent oxygenase superfamily protein
Glyma08g30140	Glyma.08G261100	3-ketoacyl-CoA synthase 6
Glyma11g14960	Glyma.11G140600	63 kDa inner membrane family protein
Glyma12g06920	Glyma.12G064100	63 kDa inner membrane family protein
Glyma03g35180	Glyma.03G194000	A20/AN1-like zinc finger family protein
Glyma12g30910	Glyma.12G183700	AAA-type ATPase family protein
Glyma05g13890	Glyma.05G079800	ABA-responsive element binding protein 3
Glyma13g39790	Glyma.13G323200	ABC transporter family protein
Glyma19g15964	Glyma.19G065100	aconitase 2
Glyma17g34281	Glyma.17G225400	ACT-like protein tyrosine kinase family protein
Glyma05g31390	Glyma.05G180100	acyl-CoA oxidase 2
Glyma01g35650	Glyma.01G153200	Adaptin family protein
Glyma09g35240	Glyma.09G218500	Adaptin family protein
Glyma16g20260	Glyma.16G109200	Adaptin family protein
Glyma06g04850	Glyma.06G045500	adenine phosphoribosyl transferase 1
Glyma04g31847	Glyma.04G159300	AGAMOUS-like 8
Glyma06g22650	Glyma.06G205800	AGAMOUS-like 8
Glyma11g33460	Glyma.11G214600	AGAMOUS-like 80
Glyma18g04760	Glyma.18G042000	AGAMOUS-like 80
Glyma04g18730	Glyma.04G148400	AGC (cAMP-dependent, cGMP-dependent and protein kinase C) kinase family protein
Glyma07g09640	Glyma.07G087500	aldehyde dehydrogenase 2C4
Glyma16g24420	Glyma.16G131700	aldehyde dehydrogenase 3F1
Glyma01g22160	Glyma.01G086900	allene oxide cyclase 4
Glyma02g42400	Glyma.02G256900	Alpha/beta hydrolase related protein
Glyma04g36460	Glyma.04G190500	alpha/beta-Hydrolases superfamily protein
Glyma06g46680	Glyma.06G310100	alpha/beta-Hydrolases superfamily protein
Glyma10g14821	Glyma.10G110700	alpha/beta-Hydrolases superfamily protein
Glyma11g19051	Glyma.11G183900	alpha/beta-Hydrolases superfamily protein
Glyma18g51140	Glyma.18G276000	alpha/beta-Hydrolases superfamily protein
Glyma08g07700	Glyma.08G072300	alternative oxidase 2
Glyma05g20400	Glyma.05G095600	Amino acid kinase family protein
Glyma12g08720	Glyma.12G081900	aminoalcoholphosphotransferase 1
Glyma11g20020	Glyma.11G194500	AMP-dependent synthetase and ligase family protein
Glyma07g26010	Glyma.07G169500	Ankyrin repeat family protein
Glyma15g17221	Glyma.15G160300	Ankyrin repeat family protein
Glyma20g04761	Glyma.20G035800	AP2/B3-like transcriptional factor family protein
Glyma05g10756	Glyma.05G090200	ARID/BRIGHT DNA-binding domain-containing protein
Glyma11g05200	Glyma.11G048400	ARM repeat superfamily protein
Glyma16g25240	Glyma.16G138300	ARM repeat superfamily protein
Glyma15g11670	Glyma.15G110200	aspartic proteinase A1
Glyma04g11991	Glyma.04G106400	ASYMMETRIC LEAVES 2-like 1
Glyma15g01840	Glyma.15G015300	ATP binding microtubule motor family protein
Glyma07g27410	Glyma.07G173300	ATP binding;nucleic acid binding;helicases
Glyma17g23940	Glyma.17G186800	ATP binding;valine-tRNA ligases;aminoacyl-tRNA ligases;nucleotide binding;ATP binding;aminoacyl-tRNA ligases
Glyma06g12210	Glyma.06G116000	ATPase family associated with various cellular activities (AAA)
Glyma01g23662	Glyma.01G094400	autoinhibited Ca2+ -ATPase, isoform 8
Glyma02g32780	Glyma.02G186100	autoinhibited Ca2+-ATPase 11
Glyma13g09043	Glyma.13G038300	Auxin efflux carrier family protein
Glyma02g13910	Glyma.02G125600	Auxin-responsive GH3 family protein
Glyma03g23690	Glyma.03G095700	BAK1-interacting receptor-like kinase 1
Glyma08g06730	Glyma.08G062800	BAK1-interacting receptor-like kinase 1
Glyma06g44660	Glyma.06G291900	basic helix-loop-helix (bHLH) DNA-binding superfamily protein
Glyma07g06090	Glyma.07G055200	basic helix-loop-helix (bHLH) DNA-binding superfamily protein
Glyma08g21130	Glyma.08G197600	basic helix-loop-helix (bHLH) DNA-binding superfamily protein
Glyma12g14400	Glyma.12G122800	basic helix-loop-helix (bHLH) DNA-binding superfamily protein
Glyma15g07010	Glyma.15G064500	basic helix-loop-helix (bHLH) DNA-binding superfamily protein
Glyma17g19570	Glyma.17G172400	basic helix-loop-helix (bHLH) DNA-binding superfamily protein
Glyma17g35423	Glyma.17G236100	basic helix-loop-helix (bHLH) DNA-binding superfamily protein
Glyma19g44570	Glyma.19G256700	basic helix-loop-helix (bHLH) DNA-binding superfamily protein
Glyma14g20040	Glyma.14G139700	basic leucine zipper 9
Glyma11g12240	Glyma.11G114800	basic leucine-zipper 44
Glyma02g19754	Glyma.02G161100	basic region/leucine zipper motif 60
Glyma05g05290	Glyma.05G064700	BAX inhibitor 1
Glyma0002s50	Glyma.02G000100	B-block binding subunit of TFIIIC
Glyma09g27100	Glyma.09G146700	BCL-2-associated athanogene 1
Glyma09g15135	Glyma.09G099400	BED zinc finger ;hAT family dimerisation domain
Glyma02g41964	Glyma.02G252400	beta HLH protein 93
Glyma04g09580	Glyma.04G090100	beta HLH protein 93
Glyma02g05790	Glyma.02G051700	beta-galactosidase 3
Glyma17g05250	Glyma.17G047400	beta-galactosidase 7
Glyma03g37710	Glyma.03G218700	beta-xylosidase 2
Glyma02g09780	Glyma.02G088900	Bifunctional inhibitor/lipid-transfer protein/seed storage 2S albumin superfamily protein
Glyma20g06290	Glyma.20G062700	Bifunctional inhibitor/lipid-transfer protein/seed storage 2S albumin superfamily protein
Glyma03g01840	Glyma.03G016400	BON association protein 2
Glyma06g03700	Glyma.06G034000	Brassinosteroid signalling positive regulator (BZR1) family protein
Glyma09g14560	Glyma.09G098400	BTB and TAZ domain protein 1
Glyma17g13540	Glyma.17G126400	BTB and TAZ domain protein 2
Glyma02g30080	Glyma.02G176700	C2 calcium/lipid-binding plant phosphoribosyltransferase family protein
Glyma13g10625	Glyma.13G003100	C2 calcium/lipid-binding plant phosphoribosyltransferase family protein
Glyma03g33060	Glyma.03G173200	C2H2 and C2HC zinc fingers superfamily protein
Glyma01g22120	Glyma.01G086800	C2H2-like zinc finger protein
Glyma14g40450	Glyma.14G218700	C2H2-like zinc finger protein
Glyma18g38340	Glyma.18G174500	C2H2-like zinc finger protein
Glyma07g36700	Glyma.07G238700	Ca2+-binding protein 1
Glyma03g02171	Glyma.03G019200	calcineurin B subunit-related
Glyma11g05190	Glyma.11G048300	calcium ATPase 2
Glyma12g21920	Glyma.12G145900	Calcium-binding EF-hand family protein
Glyma07g11540	Glyma.07G102400	Calcium-dependent lipid-binding (CaLB domain) family protein
Glyma12g13860	Glyma.12G119100	Calcium-dependent lipid-binding (CaLB domain) family protein
Glyma05g13900	Glyma.05G079700	calmodulin 5
Glyma19g19680	Glyma.19G068300	calmodulin 5
Glyma09g07470	Glyma.09G065000	calmodulin-binding family protein
Glyma15g18640	Glyma.15G171000	calmodulin-binding family protein
Glyma03g31430	Glyma.03G157800	calmodulin-like 11
Glyma09g26100	Glyma.09G140800	carbon/nitrogen insensitive 1
Glyma01g14266	Glyma.01G073200	carotenoid cleavage dioxygenase 7
Glyma14g38000	Glyma.14G200100	cation/hydrogen exchanger 15
Glyma09g10415	Glyma.09G085300	cation-chloride co-transporter 1
Glyma05g11410	Glyma.05G089200	cationic amino acid transporter 2
Glyma15g00581	Glyma.15G003400	CBL-interacting protein kinase 25
Glyma07g30470	Glyma.07G185800	CBS domain-containing protein with a domain of unknown function (DUF21)
Glyma08g25570	Glyma.08G235700	cell division control 2
Glyma10g08670	Glyma.10G074800	cell wall invertase 4
Glyma06g08250	Glyma.06G078400	ChaC-like family protein
Glyma01g13900	Glyma.01G073600	Chalcone and stilbene synthase family protein
Glyma14g11151	Glyma.14G098100	Chalcone-flavanone isomerase family protein
Glyma17g37450	Glyma.17G255300	Chaperone DnaJ-domain superfamily protein
Glyma12g25740	Glyma.12G156600	chitinase A
Glyma01g28550	Glyma.01G115100	Clathrin light chain protein
Glyma05g10840	Glyma.05G090100	Cobalamin-independent synthase family protein
Glyma02g06850	Glyma.02G061300	cold-regulated 413-plasma membrane 2
Glyma16g22801	Glyma.16G119700	Concanavalin A-like lectin protein kinase family protein
Glyma18g27290	Glyma.18G150300	Concanavalin A-like lectin protein kinase family protein
Glyma10g11680	Glyma.10G090600	Copper amine oxidase family protein
Glyma14g17110	Glyma.14G133000	Core-2/I-branching beta-1,6-N-acetylglucosaminyltransferase family protein
Glyma12g09130	Glyma.12G086200	C-repeat-binding factor 4
Glyma10g12850	Glyma.10G114400	C-terminal cysteine residue is changed to a serine 1
Glyma10g39130	Glyma.10G246000	CVP2 like 1
Glyma18g17810	Glyma.18G133100	CYCLIN D1;1
Glyma04g32371	Glyma.04G161800	Cyclin/Brf1-like TBP-binding protein
Glyma15g36180	Glyma.15G227500	cystatin B
Glyma18g20470	Glyma.18G141500	cysteine-rich RLK (RECEPTOR-like protein kinase) 2
Glyma11g32200	Glyma.11G205400	cysteine-rich RLK (RECEPTOR-like protein kinase) 3
Glyma12g24860	Glyma.12G154400	cytochrome c oxidase 17
Glyma07g15215	Glyma.07G126700	cytochrome P450, family 707, subfamily A, polypeptide 3
Glyma07g33560	Glyma.07G212700	cytochrome P450, family 707, subfamily A, polypeptide 4
Glyma14g14520	Glyma.14G117200	cytochrome P450, family 71 subfamily B, polypeptide 7
Glyma11g06690	Glyma.11G062600	cytochrome P450, family 71, subfamily B, polypeptide 34
Glyma13g06880	Glyma.13G051600	cytochrome P450, family 79, subfamily B, polypeptide 2
Glyma13g36110	Glyma.13G285300	cytochrome P450, family 82, subfamily C, polypeptide 4
Glyma03g27740	Glyma.03G122000	cytochrome P450, family 98, subfamily A, polypeptide 3
Glyma18g44100	Glyma.18G209600	D-alanine--D-alanine ligase family
Glyma05g31740	Glyma.05G183800	D-aminoacyl-tRNA deacylases
Glyma16g02270	Glyma.16G020000	D-arabinono-1,4-lactone oxidase family protein
Glyma04g17050	Glyma.04G134900	decapping 5
Glyma03g28760	Glyma.03G131900	dehydration-induced protein (ERD15)
Glyma03g12240	Glyma.03G069400	delta 1-pyrroline-5-carboxylate synthase 2
Glyma09g24810	Glyma.09G134000	detoxifying efflux carrier 35
Glyma03g12460	Glyma.03G069700	DHHC-type zinc finger family protein
Glyma01g39010	Glyma.01G183400	Disease resistance protein (CC-NBS-LRR class) family
Glyma05g09440	Glyma.05G082200	Disease resistance protein (CC-NBS-LRR class) family
Glyma05g17460	Glyma.05G082500	Disease resistance protein (CC-NBS-LRR class) family
Glyma17g21360	Glyma.17G180300	Disease resistance protein (CC-NBS-LRR class) family
Glyma13g26650	Glyma.13G194900	Disease resistance protein (TIR-NBS-LRR class) family
Glyma03g30420	Glyma.03G147900	Disease resistance-responsive (dirigent-like protein) family protein
Glyma19g33310	Glyma.19G151100	Disease resistance-responsive (dirigent-like protein) family protein
Glyma09g24930	Glyma.09G134800	Divalent ion symporter
Glyma06g03690	Glyma.06G033900	DNA glycosylase superfamily protein
Glyma05g12406	Glyma.05G088300	DNA-binding storekeeper protein-related transcriptional regulator
Glyma14g01250	Glyma.14G008900	DNAJ heat shock N-terminal domain-containing protein
Glyma18g43430	Glyma.18G204000	DNAJ heat shock N-terminal domain-containing protein
Glyma14g12131	Glyma.14G104200	DnaJ/Hsp40 cysteine-rich domain superfamily protein
Glyma15g07730	Glyma.15G071400	Dof-type zinc finger DNA-binding family protein
Glyma15g08860	Glyma.15G082400	Dof-type zinc finger DNA-binding family protein
Glyma19g38660	Glyma.19G199200	Dof-type zinc finger DNA-binding family protein
Glyma20g38100	Glyma.20G237200	Dormancy/auxin associated family protein
Glyma01g39540	Glyma.01G188600	DREB and EAR motif protein 2
Glyma07g38360	Glyma.07G253500	DUF679 domain membrane protein 2
Glyma05g32270	Glyma.05G189200	Duplicated homeodomain-like superfamily protein
Glyma12g37100	Glyma.12G242300	dynamin-like 3
Glyma10g09410	Glyma.10G078200	E2F transcription factor 3
Glyma17g05860	Glyma.17G050800	ELF4-like 4
Glyma16g00240	Glyma.16G000500	EMBRYO DEFECTIVE 140
Glyma01g20900	Glyma.01G083300	endonuclease 2
Glyma14g34600	Glyma.14G171600	Endoplasmic reticulum vesicle transporter protein
Glyma02g46350	Glyma.02G294200	EPS15 homology domain 1
Glyma02g10850	Glyma.02G098000	Eukaryotic aspartyl protease family protein
Glyma04g38550	Glyma.04G208200	Eukaryotic aspartyl protease family protein
Glyma05g32860	Glyma.05G195100	Eukaryotic aspartyl protease family protein
Glyma06g16450	Glyma.06G157500	Eukaryotic aspartyl protease family protein
Glyma13g27830	Glyma.13G208100	Eukaryotic aspartyl protease family protein
Glyma20g30590	Glyma.20G166200	eukaryotic translation initiation factor 2 (eIF-2) family protein
Glyma06g38100	Glyma.06G246400	expansin 12
Glyma01g06030	Glyma.01G050100	expansin A1
Glyma02g12140	Glyma.02G109100	expansin A1
Glyma06g20970	Glyma.06G195000	expansin A15
Glyma14g38430	Glyma.14G203900	expansin A8
Glyma02g44110	Glyma.02G273500	FAR1-related sequence 3
Glyma12g18636	Glyma.12G158200	FAR1-related sequence 5
Glyma12g26550	Glyma.12G162500	FAR1-related sequence 5
Glyma15g20030	Glyma.15G181500	fatty acid biosynthesis 1
Glyma08g29710	Glyma.08G260800	F-box and associated interaction domains-containing protein
Glyma19g24060	Glyma.19G081700	F-box and associated interaction domains-containing protein
Glyma11g18680	Glyma.11G181200	F-box family protein
Glyma15g11910	Glyma.15G112500	fibrillin
Glyma06g35786	Glyma.06G236500	Flavin-binding monooxygenase family protein
Glyma12g25950	Glyma.12G161400	flavodoxin-like quinone reductase 1
Glyma17g29720	Glyma.17G202100	flowering promoting factor 1
Glyma20g31660	Glyma.20G176600	forkhead-associated (FHA) domain-containing protein
Glyma15g20441	Glyma.15G183600	formin homolog 6
Glyma17g18000	Glyma.17G165100	FRIGIDA-like protein
Glyma08g25841	Glyma.08G237500	FTSH protease 12
Glyma14g33700	Glyma.14G166300	Galactosyltransferase family protein
Glyma06g22730	Glyma.06G205900	galacturonosyltransferase 11
Glyma07g40011	Glyma.07G269900	galacturonosyltransferase 4
Glyma07g14750	Glyma.07G108900	GATA transcription factor 2
Glyma13g37010	Glyma.13G294300	GBF\'s pro-rich region-interacting factor 1
Glyma20g05611	Glyma.20G057700	GDA1/CD39 nucleoside phosphatase family protein
Glyma14g25280	Glyma.14G157400	gibberellin 20-oxidase 3
Glyma07g36450	Glyma.07G236100	gibberellin 2-oxidase 4
Glyma17g04150	Glyma.17G037300	gibberellin 2-oxidase 4
Glyma05g09920	Glyma.05G081600	gibberellin 2-oxidase 8
Glyma13g08880	Glyma.13G039600	Gibberellin-regulated family protein
Glyma13g04530	Glyma.13G069900	Gibberellin-regulated family protein
Glyma12g12160	Glyma.12G109200	glutamine synthetase 2
Glyma14g37620	Glyma.14G196900	Glutaredoxin family protein
Glyma15g40190	Glyma.15G251500	glutathione S-transferase TAU 19
Glyma14g33830	Glyma.14G167300	glycerol-3-phosphate acyltransferase 3
Glyma12g03400	Glyma.12G030200	glycine-rich protein
Glyma14g33210	Glyma.14G163200	glycine-rich protein
Glyma11g22940	Glyma.11G176400	Glycosyl hydrolase family protein
Glyma13g22350	Glyma.13G155800	Glycosyl hydrolase family protein with chitinase insertion domain
Glyma14g13333	Glyma.14G110700	Glycosyl hydrolase family protein with chitinase insertion domain
Glyma07g06780	Glyma.07G062100	glycosyl transferase family 1 protein
Glyma06g36690	Glyma.06G240600	glycosyltransferase family protein 28
Glyma01g33380	Glyma.01G137300	golgi snare 12
Glyma03g10320	Glyma.03G065700	GRAS family transcription factor
Glyma13g34810	Glyma.13G272900	GroES-like zinc-binding alcohol dehydrogenase family protein
Glyma08g18900	Glyma.08G177300	GTP cyclohydrolase II
Glyma02g19592	Glyma.02G161000	guanosine nucleotide diphosphate dissociation inhibitor 1
Glyma08g23150	Glyma.08G216500	H(+)-ATPase 9
Glyma13g29710	Glyma.13G225100	Haloacid dehalogenase-like hydrolase (HAD) superfamily protein
Glyma04g17450	Glyma.04G135600	hAT transposon superfamily
Glyma15g26690	Glyma.15G205800	hAT transposon superfamily
Glyma18g04105	Glyma.18G036600	hAT transposon superfamily
Glyma03g32850	Glyma.03G171100	heat shock cognate protein 70-1
Glyma19g40290	Glyma.19G215400	Heat shock protein DnaJ with tetratricopeptide repeat
Glyma16g32070	Glyma.16G196200	heat shock transcription factor B2A
Glyma02g42850	Glyma.02G260700	Heavy metal transport/detoxification superfamily protein
Glyma09g24190	Glyma.09G130500	Heavy metal transport/detoxification superfamily protein
Glyma16g29670	Glyma.16G178100	Heavy metal transport/detoxification superfamily protein
Glyma03g18725	Glyma.03G081300	Helicase/SANT-associated, DNA binding protein
Glyma11g31234	Glyma.11G197900	high-level expression of sugar-inducible gene 2
Glyma01g28253	Glyma.01G113900	high-mobility group box 6
Glyma16g23420	Glyma.16G125100	histidine kinase 1
Glyma0006s50	Glyma.06G000100	histone deacetylase 1
Glyma17g34770	Glyma.17G229600	histone deacetylase 2
Glyma11g24062	Glyma.11G177800	Histone superfamily protein
Glyma01g08400	Glyma.01G064800	histone-lysine N-methyltransferase ASHH3
Glyma09g37410	Glyma.09G239400	homeobox 3
Glyma17g15380	Glyma.17G144700	homeobox protein 2
Glyma12g28701	Glyma.12G165800	homeobox protein 21
Glyma09g37680	Glyma.09G241800	homeobox-leucine zipper protein 3
Glyma06g45941	Glyma.06G303100	Homeodomain-like superfamily protein
Glyma13g19910	Glyma.13G136300	Homeodomain-like superfamily protein
Glyma05g03150	Glyma.05G046400	homolog of nucleolar protein NOP56
Glyma10g36900	Glyma.10G224400	HSP20-like chaperones superfamily protein
Glyma03g40420	Glyma.03G244300	HXXXD-type acyl-transferase family protein
Glyma04g22130	Glyma.04G151700	HXXXD-type acyl-transferase family protein
Glyma11g09330	Glyma.11G088000	hydroxy methylglutaryl CoA reductase 1
Glyma04g40440	Glyma.04G226600	IAA-leucine-resistant (ILR1)-like 3
Glyma13g40240	Glyma.13G327500	indeterminate(ID)-domain 2
Glyma15g12230	Glyma.15G115500	Inositol monophosphatase family protein
Glyma16g10360	Glyma.16G087200	Insulinase (Peptidase family M16) protein
Glyma01g20383	Glyma.01G081100	Integrase-type DNA-binding superfamily protein
Glyma06g29110	Glyma.06G221800	Integrase-type DNA-binding superfamily protein
Glyma10g22390	Glyma.10G116600	Integrase-type DNA-binding superfamily protein
Glyma09g08290	Glyma.09G071600	jasmonate-zim-domain protein 1
Glyma15g19840	Glyma.15G179600	jasmonate-zim-domain protein 1
Glyma11g19190	Glyma.11G185300	Jojoba acyl CoA reductase-related male sterility protein
Glyma02g13420	Glyma.02G121600	K-box region and MADS-box transcription factor family protein
Glyma08g36380	Glyma.08G269800	K-box region and MADS-box transcription factor family protein
Glyma18g20000	Glyma.18G141000	Kelch repeat-containing F-box family protein
Glyma18g47310	Glyma.18G238300	ketopantoate hydroxymethyltransferase 1
Glyma10g12635	Glyma.10G095600	kinesin 1
Glyma12g16580	Glyma.12G136600	kinesin 3
Glyma19g41610	Glyma.19G228300	KNOTTED1-like homeobox gene 6
Glyma17g14180	Glyma.17G132600	KNOTTED-like homeobox of Arabidopsis thaliana 7
Glyma10g34150	Glyma.10G197700	lactate/malate dehydrogenase family protein
Glyma13g16610	Glyma.13G106600	Lactoylglutathione lyase / glyoxalase I family protein
Glyma17g06060	Glyma.17G052700	Lactoylglutathione lyase / glyoxalase I family protein
Glyma03g35980	Glyma.03G201500	Late embryogenesis abundant (LEA) hydroxyproline-rich glycoprotein family
Glyma09g08310	Glyma.09G071900	Late embryogenesis abundant (LEA) hydroxyproline-rich glycoprotein family
Glyma14g04580	Glyma.14G041700	Late embryogenesis abundant (LEA) hydroxyproline-rich glycoprotein family
Glyma20g08680	Glyma.20G044800	Late embryogenesis abundant protein, group 2
Glyma15g01820	Glyma.15G015100	lectin protein kinase family protein
Glyma04g32540	Glyma.04G163400	leo1-like family protein
Glyma01g42280	Glyma.01G213600	Leucine-rich repeat protein kinase family protein
Glyma02g29610	Glyma.02G175500	Leucine-rich repeat protein kinase family protein
Glyma06g27230	Glyma.06G221400	Leucine-rich repeat protein kinase family protein
Glyma08g34790	Glyma.08G266100	Leucine-rich repeat protein kinase family protein
Glyma14g18450	Glyma.14G137700	Leucine-rich repeat protein kinase family protein
Glyma10g25440	Glyma.10G126700	Leucine-rich repeat receptor-like protein kinase family protein
Glyma01g29378	Glyma.01G118900	Leucine-rich repeat transmembrane protein kinase
Glyma10g17370	Glyma.10G104100	L-galactono-1,4-lactone dehydrogenase
Glyma15g15310	Glyma.15G143100	lipoamide dehydrogenase 1
Glyma02g26160	Glyma.13G030300	lipoxygenase 2
Glyma06g03120	Glyma.06G028400	LisH and RanBPM domains containing protein
Glyma14g16040	Glyma.14G128300	LisH dimerisation motif;WD40/YVTN repeat-like-containing domain
Glyma03g41310	Glyma.03G252500	Li-tolerant lipase 1
Glyma04g04750	Glyma.04G044800	LOB domain-containing protein 39
Glyma19g06280	Glyma.19G046300	LOB domain-containing protein 41
Glyma18g29860	Glyma.18G145900	Long-chain fatty alcohol dehydrogenase family protein
Glyma03g04080	Glyma.03G039300	LRR and NB-ARC domains-containing disease resistance protein
Glyma13g20410	Glyma.13G140900	lysine decarboxylase family protein
Glyma14g34760	Glyma.14G172700	Major facilitator superfamily protein
Glyma17g27590	Glyma.17G194600	Major facilitator superfamily protein
Glyma19g26070	Glyma.19G092100	Major facilitator superfamily protein
Glyma13g42860	Glyma.13G352300	Mannose-binding lectin superfamily protein
Glyma04g10590	Glyma.04G097900	MATE efflux family protein
Glyma04g40170	Glyma.04G223700	methyl esterase 17
Glyma05g25380	Glyma.05G124100	methyltransferases
Glyma0015s50	Glyma.15G000100	Microtubule associated protein (MAP65/ASE1) family protein
Glyma18g29131	Glyma.18G148400	MIF4G domain-containing protein / MA3 domain-containing protein
Glyma09g37320	Glyma.09G238600	mini zinc finger 2
Glyma17g03920	Glyma.17G035000	minichromosome maintenance (MCM2/3/5) family protein
Glyma13g38880	Glyma.13G312600	mitochondrial editing factor 20
Glyma02g46620	Glyma.02G296700	Mitochondrial import inner membrane translocase subunit Tim17/Tim22/Tim23 family protein
Glyma06g14420	Glyma.06G139200	Mitochondrial import inner membrane translocase subunit Tim17/Tim22/Tim23 family protein
Glyma09g05110	Glyma.09G045800	Mitochondrial substrate carrier family protein
Glyma17g31690	Glyma.17G209500	Mitochondrial substrate carrier family protein
Glyma11g15700	Glyma.U021800	mitogen-activated protein kinase 3
Glyma02g39350	Glyma.02G228300	mitogen-activated protein kinase kinase kinase 14
Glyma14g37500	Glyma.14G195300	mitogen-activated protein kinase kinase kinase 14
Glyma09g21010	Glyma.09G118300	MLP-like protein 43
Glyma17g29850	Glyma.17G203200	molybdate transporter 1
Glyma15g16330	Glyma.15G152700	Mono-/di-acylglycerol lipase, N-terminal;Lipase, class 3
Glyma07g35581	Glyma.07G228700	myb domain protein 105
Glyma01g06181	Glyma.01G051600	myb domain protein 16
Glyma17g18310	Glyma.17G167100	myb domain protein 70
Glyma05g21220	Glyma.05G098200	myb domain protein 73
Glyma18g16040	Glyma.18G123600	myb domain protein 88
Glyma03g06620	Glyma.03G051400	myb-like HTH transcriptional regulator family protein
Glyma18g02210	Glyma.18G018600	myo-inositol-1-phosphate synthase 2
Glyma17g32070	Glyma.17G211900	Myosin heavy chain-related protein
Glyma19g18820	Glyma.19G070900	Myzus persicae-induced lipase 1
Glyma05g32850	Glyma.05G195000	NAC (No Apical Meristem) domain transcriptional regulator superfamily protein
Glyma06g38410	Glyma.06G248900	NAC (No Apical Meristem) domain transcriptional regulator superfamily protein
Glyma12g22880	Glyma.12G149100	NAC (No Apical Meristem) domain transcriptional regulator superfamily protein
Glyma12g35530	Glyma.12G226500	NAC (No Apical Meristem) domain transcriptional regulator superfamily protein
Glyma06g14290	Glyma.06G138100	NAC transcription factor-like 9
Glyma03g26590	Glyma.03G113200	NAD(P)-binding Rossmann-fold superfamily protein
Glyma09g20260	Glyma.09G117300	NAD(P)-binding Rossmann-fold superfamily protein
Glyma11g25270	Glyma.11G178800	NAD(P)-binding Rossmann-fold superfamily protein
Glyma19g10800	Glyma.19G070300	NAD(P)-binding Rossmann-fold superfamily protein
Glyma02g00780	Glyma.02G005200	NAD(P)-linked oxidoreductase superfamily protein
Glyma09g19810	Glyma.09G116900	NAD+ transporter 2
Glyma05g22510	Glyma.05G106100	NADH-ubiquinone oxidoreductase-related
Glyma03g27570	Glyma.03G120800	Nascent polypeptide-associated complex (NAC), alpha subunit family protein
Glyma01g08640	Glyma.01G065800	NB-ARC domain-containing disease resistance protein
Glyma05g04350	Glyma.05G056900	nitrate transporter 1.1
Glyma01g04900	Glyma.01G042100	nitrate transporter 1:2
Glyma02g02620	Glyma.02G022200	nitrate transporter 1:2
Glyma19g30640	Glyma.19G126400	nodulin MtN21 /EamA-like transporter family protein
Glyma10g10240	Glyma.10G082800	nuclear factor Y, subunit A10
Glyma16g06720	Glyma.16G062300	nuclear protein X1
Glyma02g34563	Glyma.02G190300	Nucleic acid-binding, OB-fold-like protein
Glyma08g48050	Glyma.08G365200	Nucleic acid-binding, OB-fold-like protein
Glyma13g30980	Glyma.13G236400	Nucleic acid-binding, OB-fold-like protein
Glyma14g19550	Glyma.14G138500	Nucleotide-diphospho-sugar transferases superfamily protein
Glyma03g15680	Glyma.03G073800	Nucleotide-sugar transporter family protein
Glyma09g30390	Glyma.09G173400	nudix hydrolase homolog 4
Glyma17g32492	Glyma.17G213500	Octicosapeptide/Phox/Bem1p (PB1) domain-containing protein / tetratricopeptide repeat (TPR)-containing protein
Glyma11g14570	Glyma.11G137200	Octicosapeptide/Phox/Bem1p family protein
Glyma14g33340	Glyma.14G163900	O-fucosyltransferase family protein
Glyma15g19921	Glyma.15G180200	O-fucosyltransferase family protein
Glyma18g15770	Glyma.18G122900	O-fucosyltransferase family protein
Glyma08g46110	Glyma.08G346800	O-Glycosyl hydrolases family 17 protein
Glyma13g17200	Glyma.13G112100	oligouridylate binding protein 1B
Glyma12g34450	Glyma.12G216400	organic cation/carnitine transporter4
Glyma01g32440	Glyma.01G131900	ovate family protein 2
Glyma02g08390	Glyma.02G076500	Oxidoreductase family protein
Glyma19g31410	Glyma.19G132900	Patatin-like phospholipase family protein
Glyma15g13460	Glyma.15G128300	patatin-like protein 6
Glyma13g05150	Glyma.13G064700	Pectate lyase family protein
Glyma03g29701	Glyma.03G141000	Pectin lyase-like superfamily protein
Glyma15g19820	Glyma.15G179500	Pectin lyase-like superfamily protein
Glyma17g05550	Glyma.17G047800	Pectin lyase-like superfamily protein
Glyma07g05145	Glyma.07G046000	pectin methylesterase 3
Glyma20g22210	Glyma.20G090500	Pectinacetylesterase family protein
Glyma05g28290	Glyma.05G150200	Pentatricopeptide repeat (PPR) superfamily protein
Glyma07g21700	Glyma.07G164700	Pentatricopeptide repeat (PPR) superfamily protein
Glyma08g11280	Glyma.08G107100	Pentatricopeptide repeat (PPR) superfamily protein
Glyma16g29600	Glyma.16G177400	Pentatricopeptide repeat (PPR) superfamily protein
Glyma17g33585	Glyma.17G220100	Pentatricopeptide repeat (PPR) superfamily protein
Glyma03g38240	Glyma.03G223500	Peptide chain release factor 1
Glyma09g27196	Glyma.09G147300	Per1-like family protein
Glyma01g37630	Glyma.01G171100	Peroxidase superfamily protein
Glyma02g41320	Glyma.02G245800	pfkB-like carbohydrate kinase family protein
Glyma08g36450	Glyma.08G270300	P-glycoprotein 2
Glyma10g31265	Glyma.10G169700	phloem protein 2-B2
Glyma11g02341	Glyma.11G021000	phosphatase-related
Glyma06g10710	Glyma.06G102100	Phosphate-responsive 1 family protein
Glyma14g35330	Glyma.14G176300	Phosphate-responsive 1 family protein
Glyma11g19400	Glyma.11G188800	phosphoglycerate/bisphosphoglycerate mutase family protein
Glyma07g04901	Glyma.07G043900	Phosphoinositide phosphatase family protein
Glyma03g08955	Glyma.03G062900	Phospholipid/glycerol acyltransferase family protein
Glyma06g28331	Glyma.06G220300	Phospholipid/glycerol acyltransferase family protein
Glyma17g17440	Glyma.17G161200	Phototropic-responsive NPH3 family protein
Glyma10g09735	Glyma.10G079800	PIF1 helicase
Glyma13g12280	Glyma.13G024400	PIF1 helicase
Glyma14g15605	Glyma.14G128000	PIF1 helicase
Glyma13g35950	Glyma.13G283600	pinoid-binding protein 1
Glyma04g14010	Glyma.04G120600	PLAC8 family protein
Glyma05g34876	Glyma.05G236200	PLANT CADMIUM RESISTANCE 2
Glyma07g36440	Glyma.07G236000	Plant neutral invertase family protein
Glyma02g10620	Glyma.02G095700	Plant protein 1589 of unknown function
Glyma11g17760	Glyma.U013400	Plant protein of unknown function (DUF641)
Glyma12g19435	Glyma.12G159400	Plant protein of unknown function (DUF827)
Glyma16g15790	Glyma.16G095000	Plant protein of unknown function (DUF827)
Glyma01g06681	Glyma.01G054800	Plant protein of unknown function (DUF863)
Glyma12g15170	Glyma.12G127600	Plant Tudor-like protein
Glyma08g31614	Glyma.08G262500	plant U-box 14
Glyma03g36090	Glyma.03G202500	plant U-box 24
Glyma18g31330	Glyma.18G155200	plant U-box 9
Glyma01g27970	Glyma.01G113400	plasma membrane intrinsic protein 1B
Glyma04g00450	Glyma.04G003200	plasma membrane intrinsic protein 3
Glyma01g33430	Glyma.01G137600	plasmodesmata-located protein 8
Glyma11g30155	Glyma.U023800	plasmodesmata-located protein 8
Glyma01g15506	Glyma.01G076100	Plastid-lipid associated protein PAP / fibrillin family protein
Glyma06g09420	Glyma.06G089700	plastid-specific 50S ribosomal protein 6
Glyma01g11390	Glyma.01G096000	PLATZ transcription factor family protein
Glyma12g08810	Glyma.12G083000	PLATZ transcription factor family protein
Glyma10g35460	Glyma.10G210400	Pleckstrin homology (PH) and lipid-binding START domains-containing protein
Glyma03g28770	Glyma.03G132000	P-loop containing nucleoside triphosphate hydrolases superfamily protein
Glyma19g31511	Glyma.19G133900	P-loop containing nucleoside triphosphate hydrolases superfamily protein
Glyma18g14620	Glyma.18G116300	polyamine oxidase 2
Glyma10g17550	Glyma.10G103200	polygalacturonase abscission zone A. thaliana
Glyma15g26790	Glyma.15G209300	polygalacturonase inhibiting protein 1
Glyma12g09830	Glyma.12G093100	Polynucleotidyl transferase, ribonuclease H-like superfamily protein
Glyma14g30490	Glyma.14G159800	polypyrimidine tract-binding protein 2
Glyma20g27960	Glyma.20G141700	postsynaptic protein-related
Glyma10g24620	Glyma.10G124800	potassium channel beta subunit 1
Glyma18g43790	Glyma.18G207100	prenylated RAB acceptor 1.B4
Glyma09g30410	Glyma.09G173500	prohibitin 2
Glyma20g27160	Glyma.20G135200	proline-rich family protein
Glyma03g09870	Glyma.03G065100	protein kinase 1B
Glyma02g02340	Glyma.02G019500	protein kinase 2B
Glyma07g16450	Glyma.07G137000	Protein kinase family protein
Glyma04g21250	Glyma.04G150300	Protein kinase superfamily protein
Glyma06g46601	Glyma.06G309300	Protein kinase superfamily protein
Glyma13g10010	Glyma.13G032000	Protein kinase superfamily protein
Glyma13g39880	Glyma.13G324000	Protein kinase superfamily protein
Glyma14g02000	Glyma.14G016400	Protein kinase superfamily protein
Glyma15g31280	Glyma.15G218200	Protein kinase superfamily protein
Glyma17g07431	Glyma.17G066700	Protein kinase superfamily protein
Glyma19g11565	Glyma.19G069300	Protein kinase superfamily protein
Glyma12g27300	Glyma.U025600	Protein kinase superfamily protein
Glyma08g31000	Glyma.08G261800	Protein of unknown function (DUF1218)
Glyma12g11100	Glyma.12G102600	Protein of unknown function (DUF1218)
Glyma01g33960	Glyma.01G141100	Protein of unknown function (DUF1442)
Glyma18g49850	Glyma.18G263600	Protein of unknown function (DUF179)
Glyma04g35925	Glyma.04G185800	Protein of Unknown Function (DUF239)
Glyma14g21290	Glyma.14G142700	Protein of Unknown Function (DUF239)
Glyma06g23630	Glyma.06G212100	Protein of unknown function (DUF2921)
Glyma10g28110	Glyma.10G141000	Protein of unknown function (DUF300)
Glyma02g38395	Glyma.02G219400	Protein of unknown function (DUF3133)
Glyma07g12353	Glyma.07G123900	Protein of unknown function (DUF3550/UPF0682)
Glyma03g19480	Glyma.03G082500	Protein of unknown function (DUF3741)
Glyma18g52870	Glyma.18G291600	Protein of unknown function (DUF506)
Glyma05g15700	Glyma.05G085700	Protein of unknown function (DUF579)
Glyma01g41170	Glyma.01G203200	Protein of unknown function (DUF581)
Glyma15g19900	Glyma.15G179800	Protein of unknown function (DUF581)
Glyma18g40870	Glyma.18G188600	Protein of unknown function (DUF581)
Glyma18g03550	Glyma.18G031600	Protein of unknown function (DUF620)
Glyma20g21880	Glyma.20G087700	Protein of unknown function (DUF668)
Glyma07g37230	Glyma.07G243400	Protein of unknown function (DUF789)
Glyma09g31280	Glyma.09G181300	Protein of unknown function (DUF789)
Glyma18g42401	Glyma.18G196300	Protein of unknown function (DUF962)
Glyma02g06790	Glyma.02G060700	Protein of unknown function, DUF547
Glyma06g07440	Glyma.06G070900	Protein of unknown function, DUF642
Glyma18g42930	Glyma.18G200200	Protein of unknown function, DUF647
Glyma11g27770	Glyma.11G170200	Protein phosphatase 2C family protein
Glyma11g34410	Glyma.11G222600	protein phosphatase 2CA
Glyma09g25861	Glyma.09G139700	Protein with RNI-like/FBD-like domains
Glyma02g18320	Glyma.02G158200	Proteinase inhibitor, propeptide
Glyma08g19140	Glyma.08G179300	pumilio 7
Glyma18g49990	Glyma.18G265000	putative endonuclease or glycosyl hydrolase with C2H2-type zinc finger domain
Glyma16g24781	Glyma.16G134300	Quinoprotein amine dehydrogenase, beta chain-like; RIC1-like guanyl-nucleotide exchange factor
Glyma02g29900	Glyma.02G176000	RAB GTPase homolog A4D
Glyma13g22760	Glyma.13G159100	RabGAP/TBC domain-containing protein
Glyma08g39710	Glyma.08G287600	Radical SAM superfamily protein
Glyma20g16091	Glyma.20G066000	ralf-like 9
Glyma06g41010	Glyma.06G261800	receptor kinase 3
Glyma12g20460	Glyma.12G142200	receptor kinase 3
Glyma05g07690	Glyma.05G015900	related to AP2 11
Glyma07g35321	Glyma.07G226700	Remorin family protein
Glyma04g42790	Glyma.04G248900	replication factor C subunit 3
Glyma06g11980	Glyma.06G114100	replication factor C subunit 3
Glyma17g03380	Glyma.17G030600	response regulator 1
Glyma11g16090	Glyma.U018200	responsive to abscisic acid 28
Glyma01g41301	Glyma.01G204500	Restriction endonuclease, type II-like superfamily protein
Glyma06g44420	Glyma.06G289900	Reticulon family protein
Glyma20g32070	Glyma.20G180300	Ribophorin I
Glyma15g36190	Glyma.15G227600	Ribosomal L5P family protein
Glyma02g10860	Glyma.02G098100	Ribosomal protein L12/ ATP-dependent Clp protease adaptor protein ClpS family protein
Glyma13g34935	Glyma.13G274200	Ribosomal protein L33 family protein
Glyma04g28020	Glyma.04G139200	ribosomal protein large subunit 27
Glyma09g06491	Glyma.09G058100	ribosomal protein S12A
Glyma07g37700	Glyma.07G247600	Ribosomal protein S21e
Glyma16g01880	Glyma.16G016200	Ribosomal RNA processing Brix domain protein
Glyma18g53430	Glyma.18G296900	ribulose bisphosphate carboxylase small chain 1A
Glyma05g07498	Glyma.05G017700	RING/U-box protein
Glyma17g08986	Glyma.17G082300	RING/U-box protein
Glyma02g35090	Glyma.02G194400	RING/U-box superfamily protein
Glyma11g19750	Glyma.11G191900	Ring/U-Box superfamily protein
Glyma12g06471	Glyma.12G060800	RING/U-box superfamily protein
Glyma14g24260	Glyma.14G152800	RING/U-box superfamily protein
Glyma19g01420	Glyma.19G011200	RING/U-box superfamily protein
Glyma18g40130	Glyma.18G184200	RING-H2 finger C2A
Glyma18g17166	Glyma.18G130000	RNA polymerase I subunit 43
Glyma18g34191	Glyma.18G163300	RNA polymerase II, Rpb4, core protein
Glyma08g34030	Glyma.08G265300	RNA recognition motif (RRM)-containing protein
Glyma14g37180	Glyma.14G192900	RNA recognition motif (RRM)-containing protein
Glyma04g10900	Glyma.04G100600	RNA-binding (RRM/RBD/RNP motifs) family protein
Glyma10g26920	Glyma.10G134100	RNA-binding (RRM/RBD/RNP motifs) family protein
Glyma16g22290	Glyma.16G116600	RNA-binding (RRM/RBD/RNP motifs) family protein
Glyma11g09630	Glyma.11G090900	RNAse l inhibitor protein 2
Glyma14g09781	Glyma.14G088400	ROOT HAIR DEFECTIVE 6-LIKE 2
Glyma15g06090	Glyma.15G055400	RPM1-interacting protein 4 (RIN4) family protein
Glyma18g48890	Glyma.18G253900	rRNA processing protein-related
Glyma12g02430	Glyma.12G021500	Saccharopine dehydrogenase
Glyma15g35240	Glyma.15G223100	SAD1/UNC-84 domain protein 1
Glyma05g06050	Glyma.05G070000	S-adenosyl-L-methionine-dependent methyltransferases superfamily protein
Glyma10g13791	Glyma.10G113000	S-adenosyl-L-methionine-dependent methyltransferases superfamily protein
Glyma16g17500	Glyma.16G105300	S-adenosyl-L-methionine-dependent methyltransferases superfamily protein
Glyma14g01990	Glyma.14G016300	salt-inducible zinc finger 1
Glyma08g24663	Glyma.08G229600	SART-1 family
Glyma11g10260	Glyma.11G096800	SAUR-like auxin-responsive protein family
Glyma18g13373	Glyma.18G110300	SAUR-like auxin-responsive protein family
Glyma01g01380	Glyma.01G010300	SCAMP family protein
Glyma07g39650	Glyma.07G266500	SCARECROW-like 13
Glyma14g08180	Glyma.14G075300	Sec14p-like phosphatidylinositol transfer family protein
Glyma05g34420	Glyma.05G240700	semialdehyde dehydrogenase family protein
Glyma11g29750	Glyma.11G163100	senescence associated gene 20
Glyma18g03080	Glyma.18G027000	sequence-specific DNA binding transcription factors;zinc ion binding;sequence-specific DNA binding transcription factors
Glyma07g06480	Glyma.07G058800	serine acetyltransferase 1;1
Glyma06g03960	Glyma.06G036300	Serine protease inhibitor (SERPIN) family protein
Glyma16g21831	Glyma.16G114700	serine/threonine phosphatase 7
Glyma18g17081	Glyma.18G129600	serine-rich protein-related
Glyma13g30760	Glyma.13G234400	Seven transmembrane MLO family protein
Glyma02g33350	Glyma.02G186700	S-formylglutathione hydrolase
Glyma01g01890	Glyma.01G014900	shikimate kinase like 2
Glyma14g31370	Glyma.14G160600	sigma factor E
Glyma18g31665	Glyma.18G156300	Signal recognition particle, SRP9/SRP14 subunit
Glyma02g21830	Glyma.02G162500	Single-stranded nucleic acid binding R3H protein
Glyma06g40400	Glyma.14G054500	S-locus lectin protein kinase family protein
Glyma17g16060	Glyma.17G150500	S-locus protein kinase, putative
Glyma04g33490	Glyma.04G168800	Small GTP-binding protein
Glyma15g11070	Glyma.15G104000	SNARE associated Golgi protein family
Glyma15g18991	Glyma.15G173500	SNF7 family protein
Glyma07g14641	Glyma.07G109500	squamosa promoter binding protein-like 9
Glyma19g40550	Glyma.19G217700	stachyose synthase
Glyma14g05230	Glyma.14G047800	Subtilisin-like serine endopeptidase family protein
Glyma15g35460	Glyma.15G224500	Subtilisin-like serine endopeptidase family protein
Glyma01g39020	Glyma.01G183500	sucrose nonfermenting 1(SNF1)-related protein kinase 2.3
Glyma14g21230	Glyma.14G142300	Sulfite exporter TauE/SafE family protein
Glyma01g27840	Glyma.01G113000	sulfoquinovosyldiacylglycerol 2
Glyma19g11360	Glyma.19G069400	suppressor of npr1-1 constitutive 4
Glyma19g18360	Glyma.19G071500	SWIB/MDM2 domain superfamily protein
Glyma20g38300	Glyma.20G239100	syntaxin of plants 43
Glyma17g13065	Glyma.17G121500	TCP family transcription factor
Glyma20g29330	Glyma.20G154400	TCP family transcription factor
Glyma12g09250	Glyma.12G087300	TCP-1/cpn60 chaperonin family protein
Glyma14g14750	Glyma.09G223500	Tesmin/TSO1-like CXC domain-containing protein
Glyma17g09150	Glyma.17G084000	tetraspanin11
Glyma06g10970	Glyma.06G104600	tetratricopeptide repeat (TPR)-containing protein
Glyma02g42240	Glyma.02G255200	Tetratricopeptide repeat (TPR)-like superfamily protein
Glyma03g32430	Glyma.03G167200	Tetratricopeptide repeat (TPR)-like superfamily protein
Glyma05g21880	Glyma.05G102400	Tetratricopeptide repeat (TPR)-like superfamily protein
Glyma06g30000	Glyma.06G223500	Tetratricopeptide repeat (TPR)-like superfamily protein
Glyma06g32050	Glyma.06G226800	Tetratricopeptide repeat (TPR)-like superfamily protein
Glyma13g10430	Glyma.13G001700	Tetratricopeptide repeat (TPR)-like superfamily protein
Glyma14g01860	Glyma.14G014900	Tetratricopeptide repeat (TPR)-like superfamily protein
Glyma15g41110	Glyma.15G258500	Tetratricopeptide repeat (TPR)-like superfamily protein
Glyma19g14930	Glyma.19G064500	Tetratricopeptide repeat (TPR)-like superfamily protein
Glyma20g27990	Glyma.20G142000	thiazole biosynthetic enzyme, chloroplast (ARA6) (THI1) (THI4)
Glyma10g02600	Glyma.10G021200	Thioredoxin superfamily protein
Glyma13g30770	Glyma.13G234500	Thioredoxin superfamily protein
Glyma15g12200	Glyma.15G115200	tonoplast dicarboxylate transporter
Glyma03g32103	Glyma.03G164100	Transcription factor jumonji (jmj) family protein / zinc finger (C5HC2 type) family protein
Glyma09g34040	Glyma.09G207400	Transcription factor jumonji (jmj) family protein / zinc finger (C5HC2 type) family protein
Glyma12g09990	Glyma.12G094500	transcription factor-related
Glyma16g02620	Glyma.16G023300	transducin family protein / WD-40 repeat family protein
Glyma03g19680	Glyma.03G082800	Transducin/WD40 repeat-like superfamily protein
Glyma05g10590	Glyma.05G090500	Transducin/WD40 repeat-like superfamily protein
Glyma12g15500	Glyma.12G129800	trehalose-phosphatase/synthase 7
Glyma02g03560	Glyma.02G031100	TRICHOME BIREFRINGENCE-LIKE 27
Glyma07g34800	Glyma.07G222200	Trypsin family protein
Glyma01g02963	Glyma.01G024100	TTF-type zinc finger protein with HAT dimerisation domain
Glyma10g23711	Glyma.10G121200	TTF-type zinc finger protein with HAT dimerisation domain
Glyma04g09350	Glyma.04G088500	tubulin alpha-2 chain
Glyma19g16138	Glyma.19G065400	Tudor/PWWP/MBT superfamily protein
Glyma03g26580	Glyma.03G113100	ubiquitin E2 variant 1D-4
Glyma19g26760	Glyma.19G096500	Ubiquitin family protein
Glyma05g34630	Glyma.05G238500	ubiquitin fusion degradation 1
Glyma06g01000	Glyma.06G007600	ubiquitin fusion degradation 1
Glyma18g25870	Glyma.18G152700	Ubiquitin supergroup;Ribosomal protein L40e
Glyma10g18310	Glyma.10G096200	ubiquitin-conjugating enzyme 10
Glyma14g29120	Glyma.14G124300	ubiquitin-conjugating enzyme 10
Glyma01g02780	Glyma.01G022600	U-box domain-containing protein kinase family protein
Glyma09g33230	Glyma.09G199700	U-box domain-containing protein kinase family protein
Glyma07g13840	Glyma.07G115000	uclacyanin 3
Glyma19g37108	Glyma.19G187400	UDP-glucosyl transferase 73C2
Glyma10g40900	Glyma.10G262700	UDP-glucosyl transferase 84B1
Glyma14g35270	Glyma.14G175800	UDP-glucosyl transferase 85A3
Glyma15g05980	Glyma.15G054300	UDP-glucosyl transferase 85A7
Glyma07g13560	Glyma.07G116500	UDP-Glycosyltransferase superfamily protein
Glyma17g26531	Glyma.17G191500	Uncharacterised conserved protein (UCP030365)
Glyma03g05230	Glyma.03G042800	Uncharacterised protein family (UPF0497)
Glyma14g37210	Glyma.14G193100	Undecaprenyl pyrophosphate synthetase family protein
Glyma01g01410	Glyma.01G010600	Unkown Protein
Glyma01g02260	Glyma.01G018500	Unkown Protein
Glyma01g04400	Glyma.01G037300	Unkown Protein
Glyma01g15630	Glyma.01G076200	Unkown Protein
Glyma01g25903	Glyma.01G105100	Unkown Protein
Glyma01g30535	Glyma.01G122500	Unkown Protein
Glyma01g38211	Glyma.01G175700	Unkown Protein
Glyma01g38910	Glyma.01G182300	Unkown Protein
Glyma01g41440	Glyma.01G205800	Unkown Protein
Glyma02g15895	Glyma.02G140800	Unkown Protein
Glyma02g16911	Glyma.02G150200	Unkown Protein
Glyma02g41430	Glyma.02G247000	Unkown Protein
Glyma02g47931	Glyma.02G309200	Unkown Protein
Glyma03g10540	Glyma.03G066000	Unkown Protein
Glyma03g13366	Glyma.03G080200	Unkown Protein
Glyma03g29590	Glyma.03G139500	Unkown Protein
Glyma04g00925	Glyma.04G007200	Unkown Protein
Glyma04g02280	Glyma.04G020700	Unkown Protein
Glyma04g13901	Glyma.04G119800	Unkown Protein
Glyma04g30980	Glyma.04G157900	Unkown Protein
Glyma04g32560	Glyma.04G163500	Unkown Protein
Glyma04g40823	Glyma.04G230000	Unkown Protein
Glyma05g02685	Glyma.05G042100	Unkown Protein
Glyma05g16563	Glyma.05G084000	Unkown Protein
Glyma05g36990	Glyma.05G215700	Unkown Protein
Glyma05g35490	Glyma.05G230500	Unkown Protein
Glyma06g14110	Glyma.06G136100	Unkown Protein
Glyma06g14280	Glyma.06G138000	Unkown Protein
Glyma06g38049	Glyma.06G245900	Unkown Protein
Glyma07g03646	Glyma.07G032500	Unkown Protein
Glyma07g11750	Glyma.07G104100	Unkown Protein
Glyma07g36710	Glyma.07G238800	Unkown Protein
Glyma07g37781	Glyma.07G248500	Unkown Protein
Glyma08g02560	Glyma.08G021800	Unkown Protein
Glyma08g29420	Glyma.08G260300	Unkown Protein
Glyma08g29920	Glyma.08G261000	Unkown Protein
Glyma09g04740	Glyma.09G042300	Unkown Protein
Glyma09g04760	Glyma.09G042500	Unkown Protein
Glyma09g07640	Glyma.09G066400	Unkown Protein
Glyma09g12020	Glyma.09G091600	Unkown Protein
Glyma09g15630	Glyma.09G103100	Unkown Protein
Glyma18g37370	Glyma.09G113900	Unkown Protein
Glyma09g33720	Glyma.09G204400	Unkown Protein
Glyma10g05400	Glyma.10G046900	Unkown Protein
Glyma10g24561	Glyma.10G124400	Unkown Protein
Glyma10g28950	Glyma.10G148200	Unkown Protein
Glyma10g40260	Glyma.10G256500	Unkown Protein
Glyma10g41300	Glyma.10G266900	Unkown Protein
Glyma11g07281	Glyma.11G068100	Unkown Protein
Glyma11g21580	Glyma.11G154700	Unkown Protein
Glyma11g33741	Glyma.11G216700	Unkown Protein
Glyma11g37810	Glyma.11G243100	Unkown Protein
Glyma12g09010	Glyma.12G084900	Unkown Protein
Glyma12g10610	Glyma.12G099200	Unkown Protein
Glyma12g33440	Glyma.12G206700	Unkown Protein
Glyma12g35640	Glyma.12G227600	Unkown Protein
Glyma02g26490	Glyma.13G031000	Unkown Protein
Glyma13g07516	Glyma.13G046900	Unkown Protein
Glyma13g32395	Glyma.13G250600	Unkown Protein
Glyma13g37000	Glyma.13G294200	Unkown Protein
Glyma13g44010	Glyma.13G363200	Unkown Protein
Glyma14g08190	Glyma.14G075400	Unkown Protein
Glyma14g08511	Glyma.14G078300	Unkown Protein
Glyma14g13770	Glyma.14G112500	Unkown Protein
Glyma14g27070	Glyma.14G118900	Unkown Protein
Glyma14g16965	Glyma.14G131800	Unkown Protein
Glyma14g18500	Glyma.14G137800	Unkown Protein
Glyma14g25441	Glyma.14G158400	Unkown Protein
Glyma14g25450	Glyma.14G158500	Unkown Protein
Glyma14g36225	Glyma.14G183900	Unkown Protein
Glyma14g37460	Glyma.14G195100	Unkown Protein
Glyma15g23520	Glyma.15G197500	Unkown Protein
Glyma15g36570	Glyma.15G228400	Unkown Protein
Glyma15g40185	Glyma.15G251400	Unkown Protein
Glyma16g07641	Glyma.16G070800	Unkown Protein
Glyma17g04740	Glyma.17G042600	Unkown Protein
Glyma17g14120	Glyma.17G132000	Unkown Protein
Glyma17g17150	Glyma.17G159100	Unkown Protein
Glyma17g29257	Glyma.17G198100	Unkown Protein
Glyma17g29540	Glyma.17G200500	Unkown Protein
Glyma18g13680	Glyma.18G111600	Unkown Protein
Glyma18g28250	Glyma.18G149300	Unkown Protein
Glyma18g44635	Glyma.18G214100	Unkown Protein
Glyma18g52620	Glyma.18G289200	Unkown Protein
Glyma19g03570	Glyma.19G029200	Unkown Protein
Glyma19g14810	Glyma.19G064200	Unkown Protein
Glyma19g33850	Glyma.19G156000	Unkown Protein
Glyma19g34605	Glyma.19G163100	Unkown Protein
Glyma20g24645	Glyma.20G112200	Unkown Protein
Glyma20g24980	Glyma.20G116000	Unkown Protein
Glyma20g26010	Glyma.20G124400	Unkown Protein
Glyma14g23990	Glyma.14G151400	vacuolar H+-pumping ATPase 16 kDa proteolipid subunit 4
Glyma13g42840	Glyma.13G352200	vacuolar protein sorting 46.1
Glyma06g03040	Glyma.06G027600	vacuolar proton ATPase A3
Glyma18g13250	Glyma.18G109800	vacuoleless1 (VCL1)
Glyma13g28600	Glyma.13G214700	vamp/synaptobrevin-associated protein 27-2
Glyma10g37971	Glyma.10G235200	VASCULAR-RELATED NAC-DOMAIN 6
Glyma10g23295	Glyma.10G118800	VEFS-Box of polycomb protein
Glyma09g05070	Glyma.09G045400	vesicle-associated membrane protein 724
Glyma10g42480	Glyma.10G278100	vesicle-associated membrane protein 727
Glyma17g24992	Glyma.17G188900	villin 4
Glyma14g40270	Glyma.14G220300	VPS35 homolog B
Glyma17g37870	Glyma.17G259200	VPS35 homolog B
Glyma10g01660	Glyma.10G013400	Vps51/Vps67 family (components of vesicular transport) protein
Glyma08g36730	Glyma.08G272000	VQ motif-containing protein
Glyma09g16392	Glyma.09G108100	winged-helix DNA-binding transcription factor family protein
Glyma05g25770	Glyma.05G127600	WRKY DNA-binding protein 28
Glyma06g27440	Glyma.06G219800	WRKY DNA-binding protein 32
Glyma02g39870	Glyma.02G232600	WRKY DNA-binding protein 33
Glyma14g38010	Glyma.14G200200	WRKY DNA-binding protein 33
Glyma13g17800	Glyma.13G117600	WRKY family transcription factor
Glyma19g44380	Glyma.19G254800	WRKY family transcription factor
Glyma20g13540	Glyma.20G056900	Xanthine/uracil permease family protein
Glyma15g33680	Glyma.15G204700	XH/XS domain-containing protein
Glyma16g15580	Glyma.16G094900	x-ray induced transcript 1
Glyma17g06720	Glyma.17G059700	Ypt/Rab-GAP domain of gyp1p superfamily protein
Glyma20g20180	Glyma.20G080000	YUCCA 3
Glyma01g23870	Glyma.01G097900	Zinc finger (C3HC4-type RING finger) family protein
Glyma09g27300	Glyma.09G148000	zinc finger WD40 repeat protein 1
Glyma07g26470	Glyma.07G170200	Zinc finger, C3HC4 type (RING finger) family protein
Glyma11g37410	Glyma.11G247100	Zincin-like metalloproteases family protein
